# Supplementary material
Source: publisher figshare collection journal article supplement (https://acs.figshare.com/ndownloader/files/11416997)
Supplement: Supplementary file 1 [file 11416997]

# Supporting Information

## Sulfur-Doped Carbon Nanotemplates for Sodium Metal Anodes

*Hyeon Ji Yoon,<sup>1</sup> Seung Ki Hong,<sup>2</sup> Min Eui Lee,<sup>1</sup> Junyeon Hwang,<sup>2</sup> Hyoung-Joon Jin,<sup>1,\*</sup> and Young Soo Yun<sup>3,\*</sup>*

*<sup>1</sup>Department of Polymer Science and Engineering, Inha University, 100, Inha-ro, Nam-gu, Incheon 22212, Korea*

*<sup>2</sup>Carbon Composite Materials Research Center, Institute of Advanced Composite Materials, Korea Institute of Science and Technology, 92 Chudong-ro, Bongdong-eup, Wanju-gun, Jeollabuk-do 55324 Republic of Korea*

*<sup>3</sup>Department of Chemical Engineering, Kangwon National University, 346, Jungang-ro, Samcheok-si, Gangwon-do 25913, Korea*

### Corresponding Author

*\*H.-J. Jin, E-mail address: hjjin@inha.ac.kr*

*\*Y. S. Yun, E-mail address: ysyun@kangwon.ac.kr*

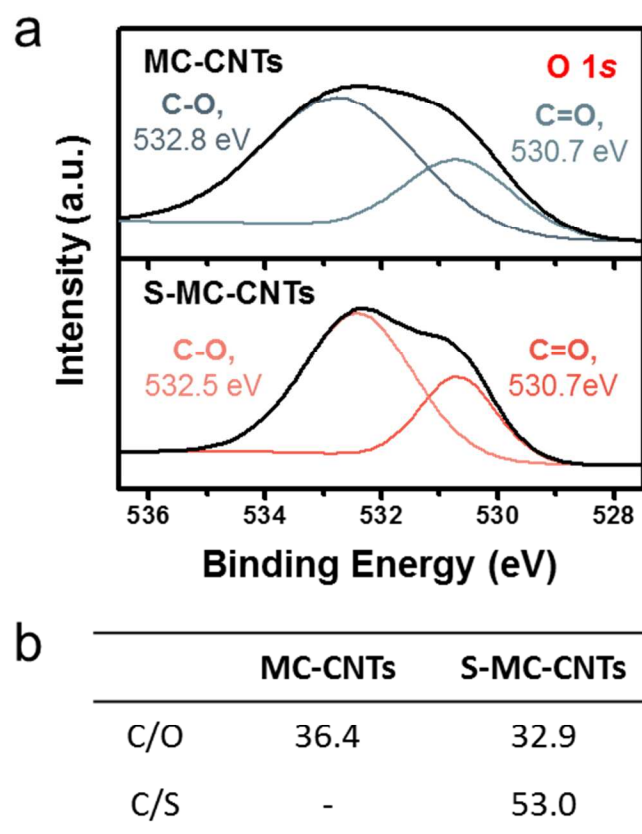

**Figure S1.** (a) XPS O 1s spectra of MC-CNTs and S-MC-CNTs, and (b) C/O and C/S ratios of MC-CNTs and S-MC-CNTs.

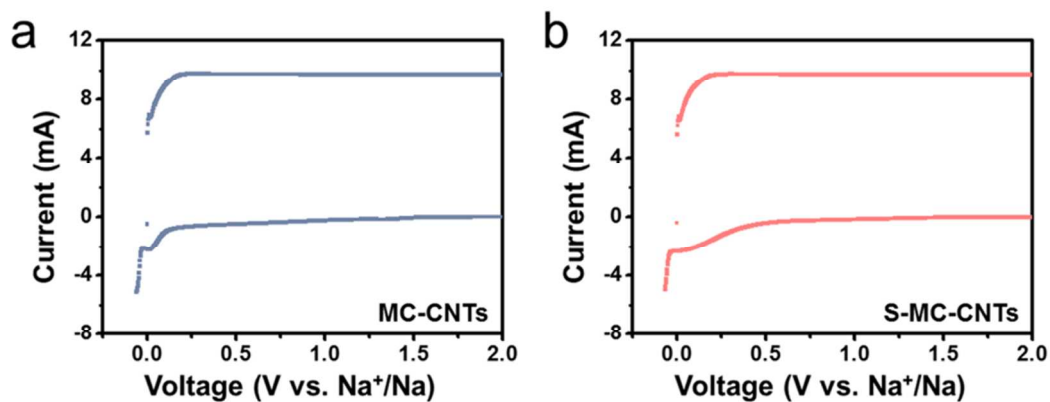

**Figure S2.** Cyclic voltammograms of (a) MC-CNTs and (b) S-MC-CNTs characterized at a scan rate of  $1 \text{ mV s}^{-1}$  in an electrolyte of 1 M NaPF<sub>6</sub> dissolved in DEGDME. The anodic scan was cut-off when the current reached  $< -5 \text{ mA}$ , while the cathodic scan was cut-off at a voltage above 2.0 V.

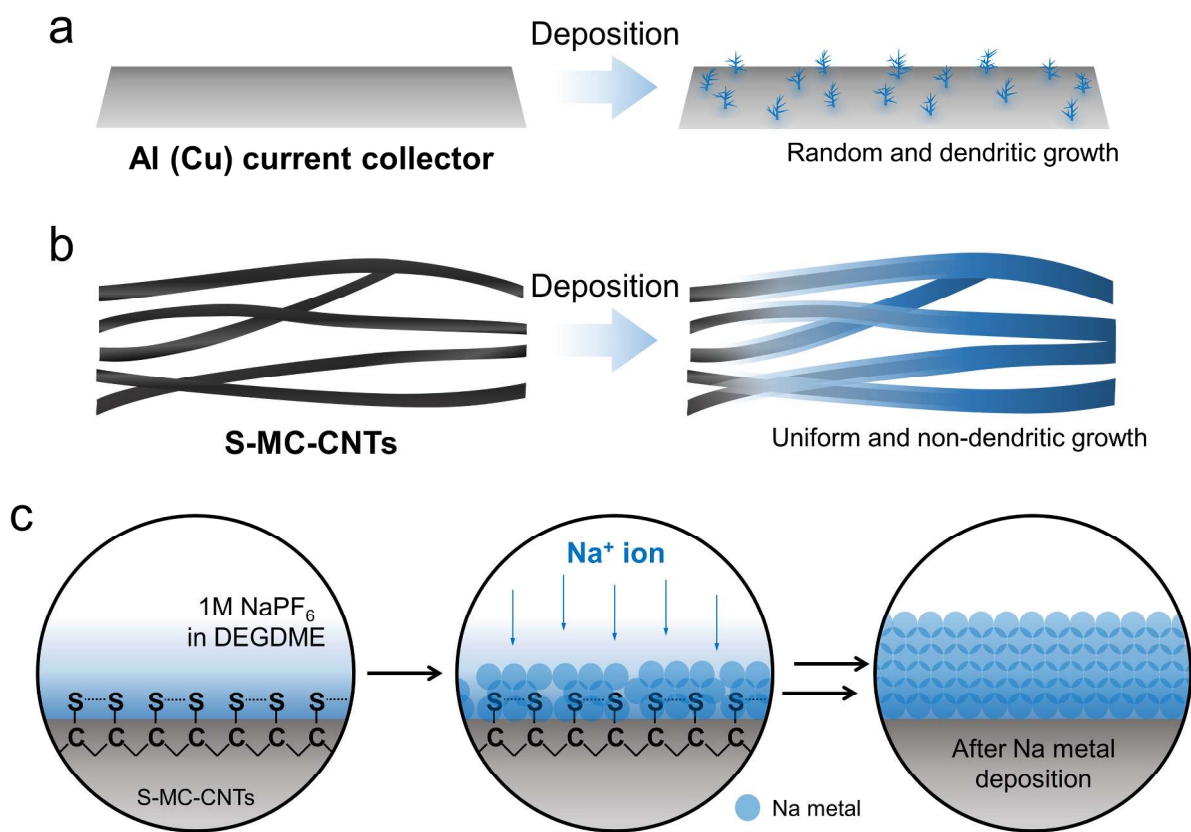

**Figure S3.** Schematic images exhibiting the sodium metal deposition/dissolution process on (a) a conventional metal current collector and (b) S-MC-CNTs on which specific the sodium metal deposition process is depicted in (c).

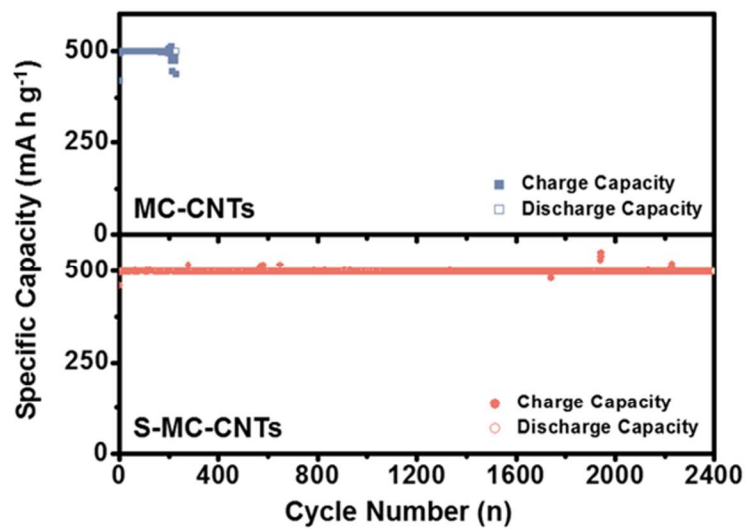

**Figure S4.** Cycling performances of MC-CNTs and S-MC-CNT-based anodes tested at a current rate of  $2 \text{ A cm}^{-2}$  with a cut-off capacity of  $500 \text{ mA h g}^{-1}$ .

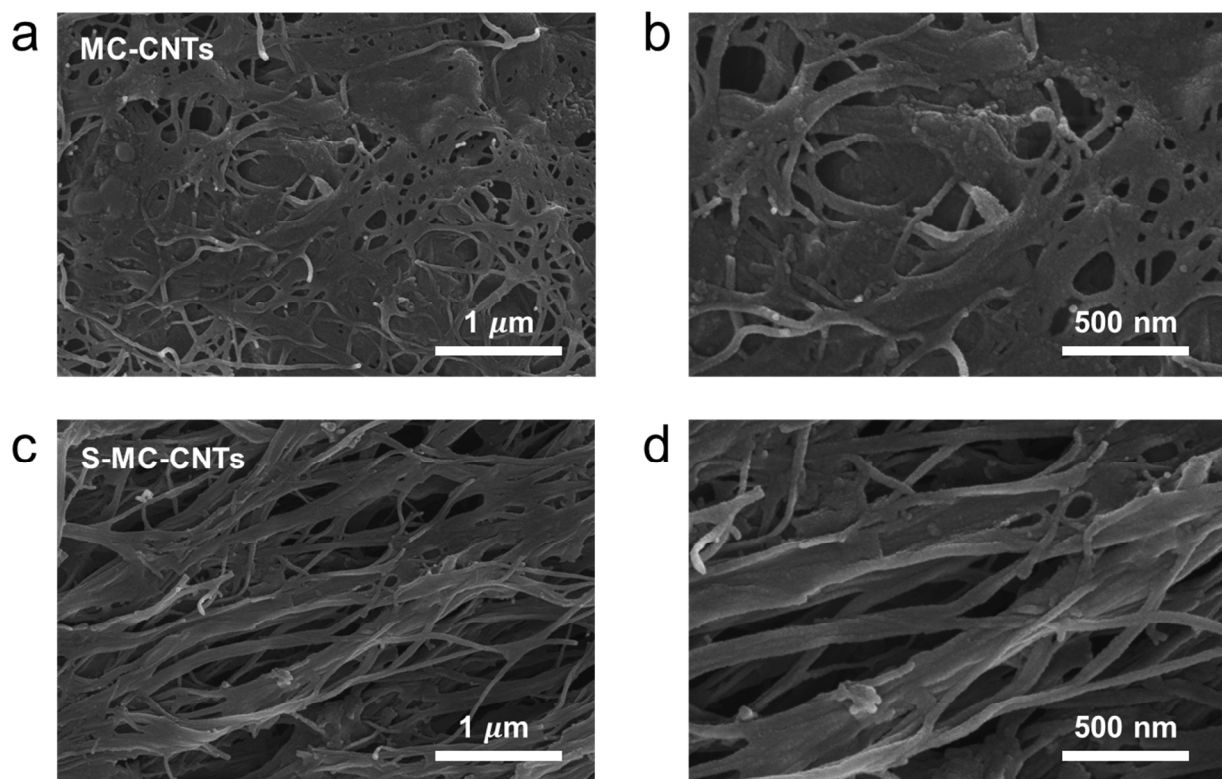

**Figure S5.** Ex-situ FE-SEM images of (a, b) MC-CNTs and (c, d) S-MC-CNTs after the 200<sup>th</sup> galvanostatic sodium metal deposition/stripping cycle.

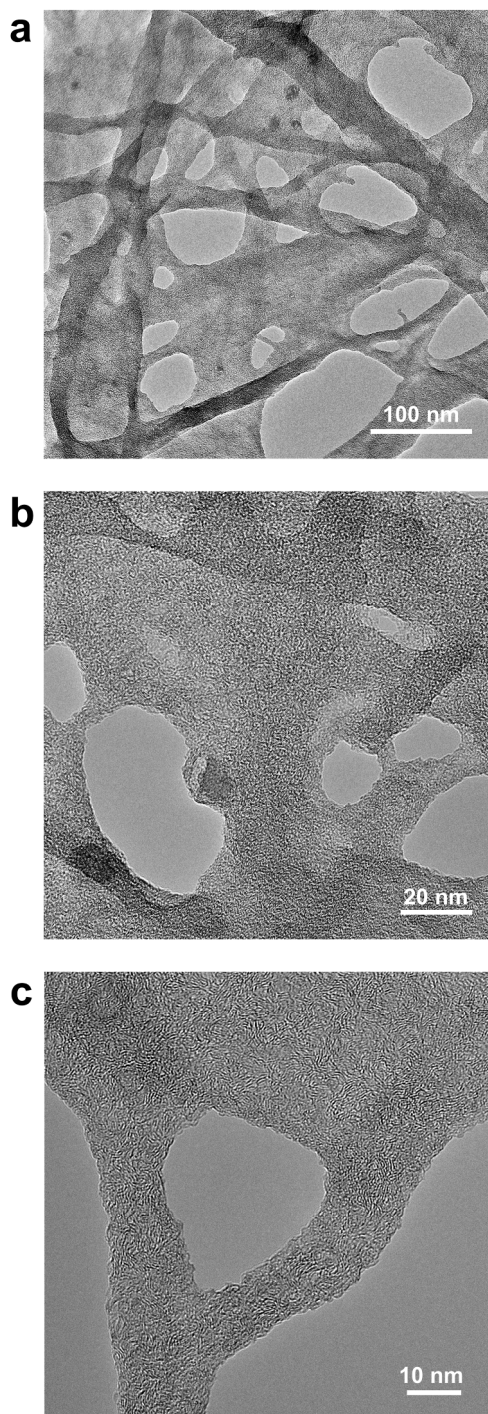

**Figure S6.** (a-c) Ex-situ FE-TEM images of MC-CNTs after 200<sup>th</sup> cycle, characterized at different magnifications.

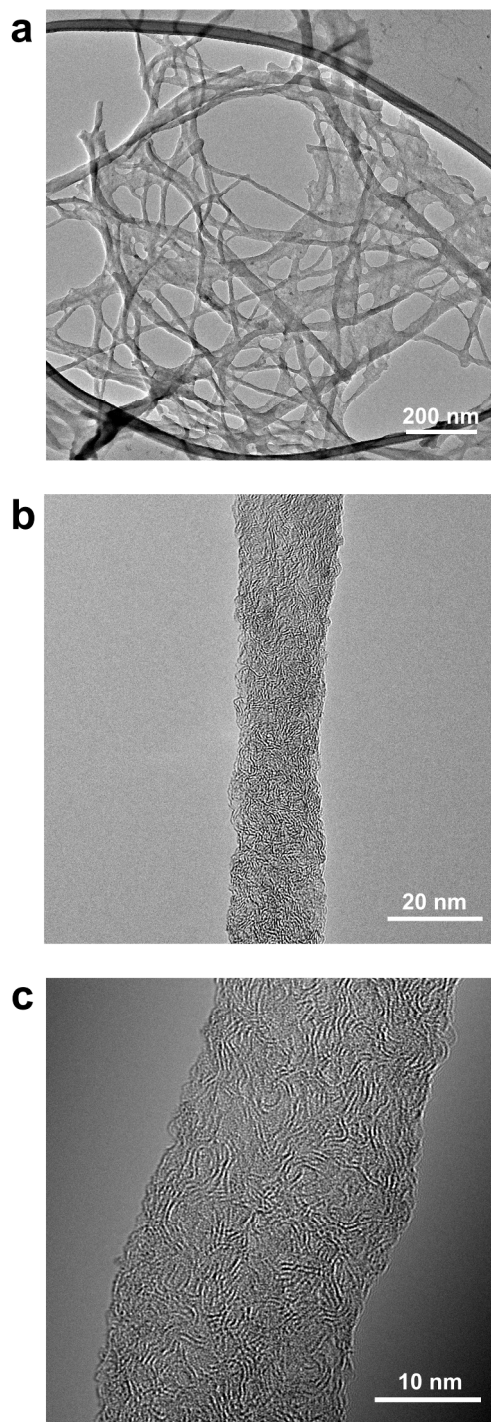

**Figure S7.** (a-c) Ex-situ FE-TEM images of S-MC-CNTs after 200<sup>th</sup> cycle, characterized at different magnifications.
